# Supplementary material for: Relating the structure, properties, and activities of nanostructured SrTiO3 and SrO–(SrTiO3)n (n = 1 and 2) for photocatalytic hydrogen evolution
Source: Royal Society of Chemistry journal article supplement (doi:10.1039/d2ma00097k), 2022-01-01
Supplement: d2ma00097k1.pdf [file d2ma00097k1.pdf]

**Relating Structure, Property, and Activity of nanostructured SrTiO<sub>3</sub> and SrO-(SrTiO<sub>3</sub>)<sub>n</sub>  
(n= 1 and 2) for Photocatalytic Hydrogen Evolution**

Aditi Vijay, Kadambari Bairagi, Sonalika Vaidya\*

Institute of Nano Science and Technology, Knowledge City, Sector 81, Sahibzada Ajit Singh  
Nagar, Punjab 140306, India

Corresponding Author: [s vaidya@inst.ac.in](mailto:s vaidya@inst.ac.in)

**Supporting Information**

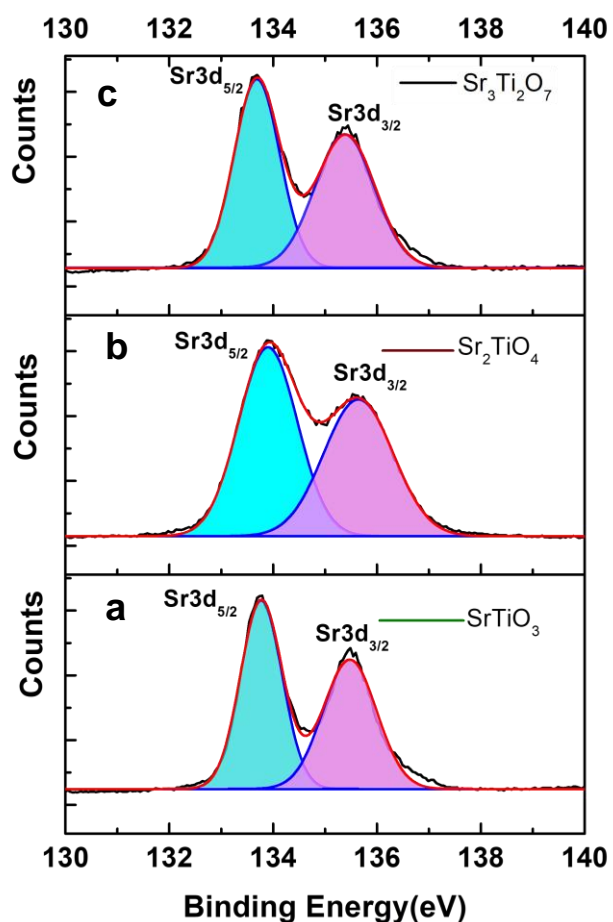

Figure S1: High Resolution Sr (3d) XPS spectra of (a) SrTiO<sub>3</sub>, (b) Sr<sub>2</sub>TiO<sub>4</sub>, and (c) Sr<sub>3</sub>Ti<sub>2</sub>O<sub>7</sub>.

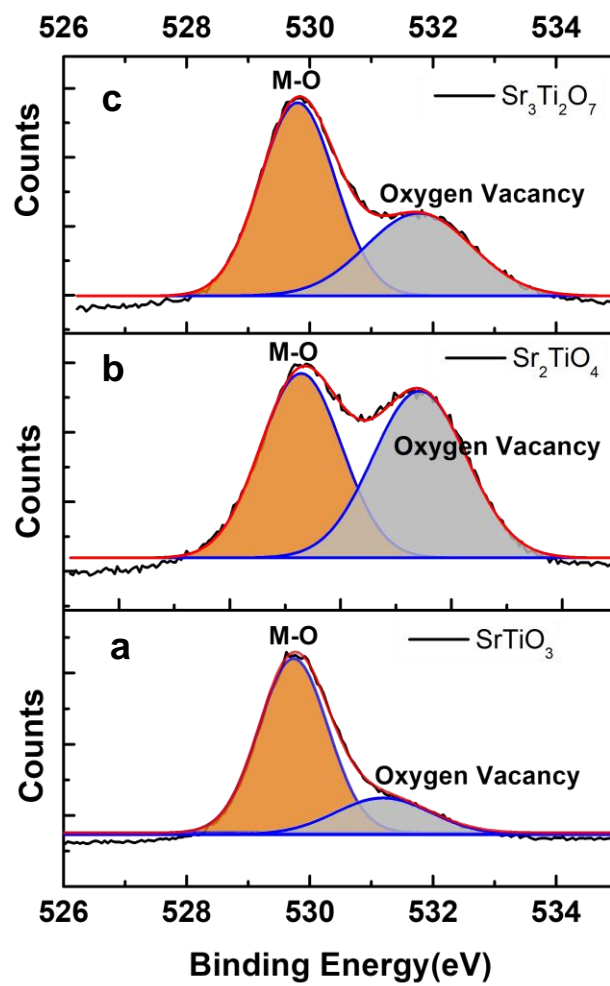

Figure S2: High Resolution O (1s) XPS spectra of (a) SrTiO<sub>3</sub>, (b) Sr<sub>2</sub>TiO<sub>4</sub>, and (c) Sr<sub>3</sub>Ti<sub>2</sub>O<sub>7</sub>.

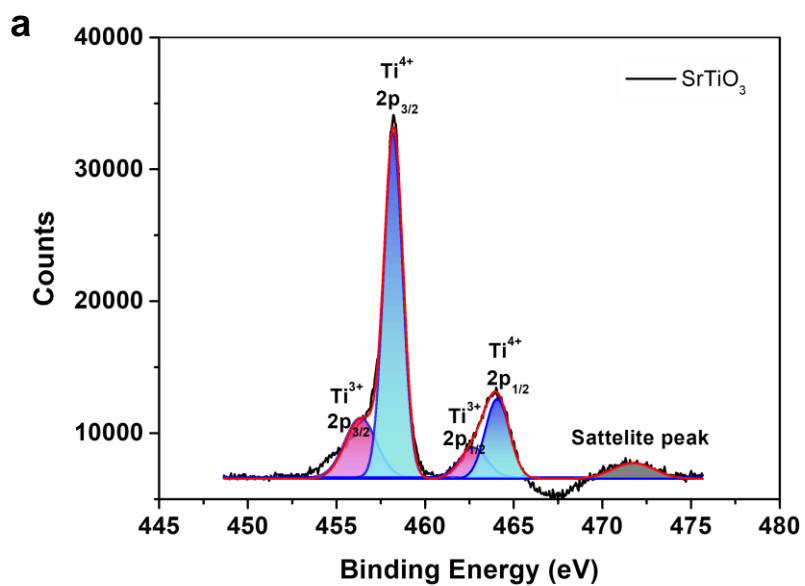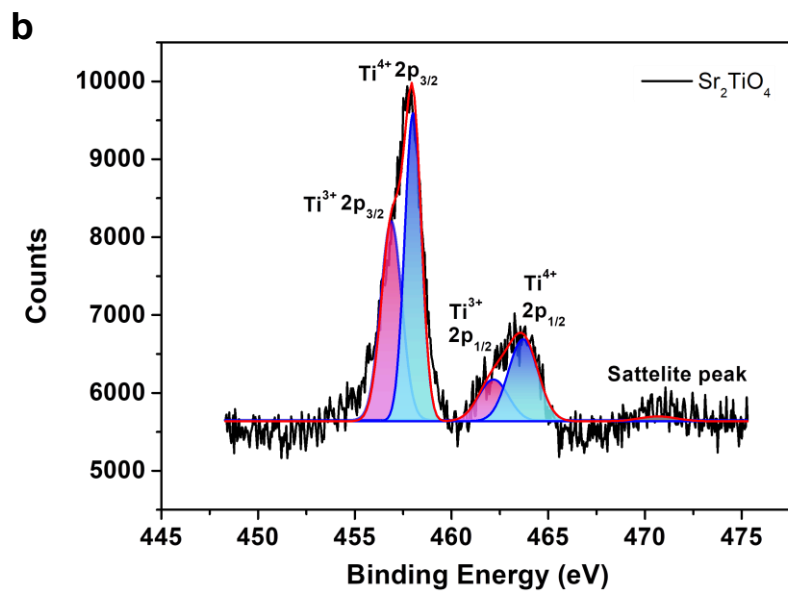

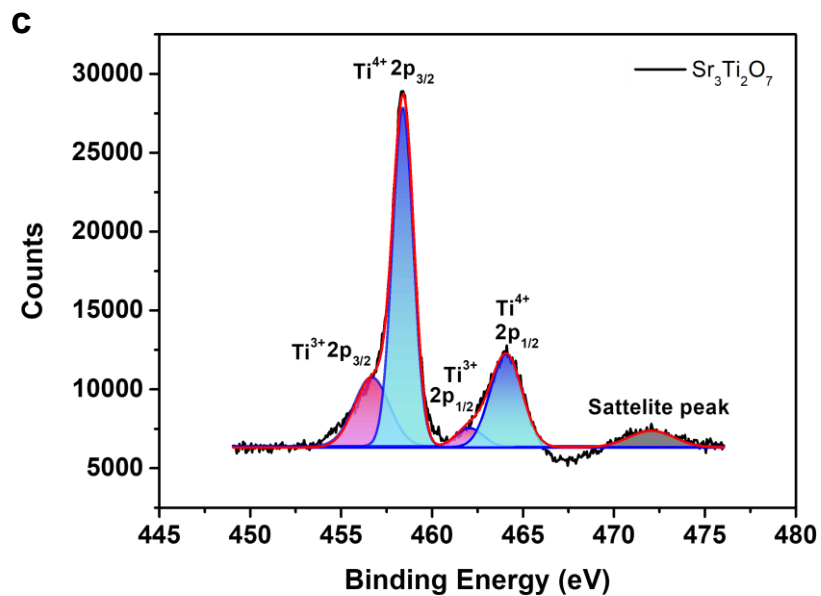

Figure S3: High Resolution Ti (2p) XPS spectra of (a) SrTiO<sub>3</sub>, (b) Sr<sub>2</sub>TiO<sub>4</sub>, and (c) Sr<sub>3</sub>Ti<sub>2</sub>O<sub>7</sub>.

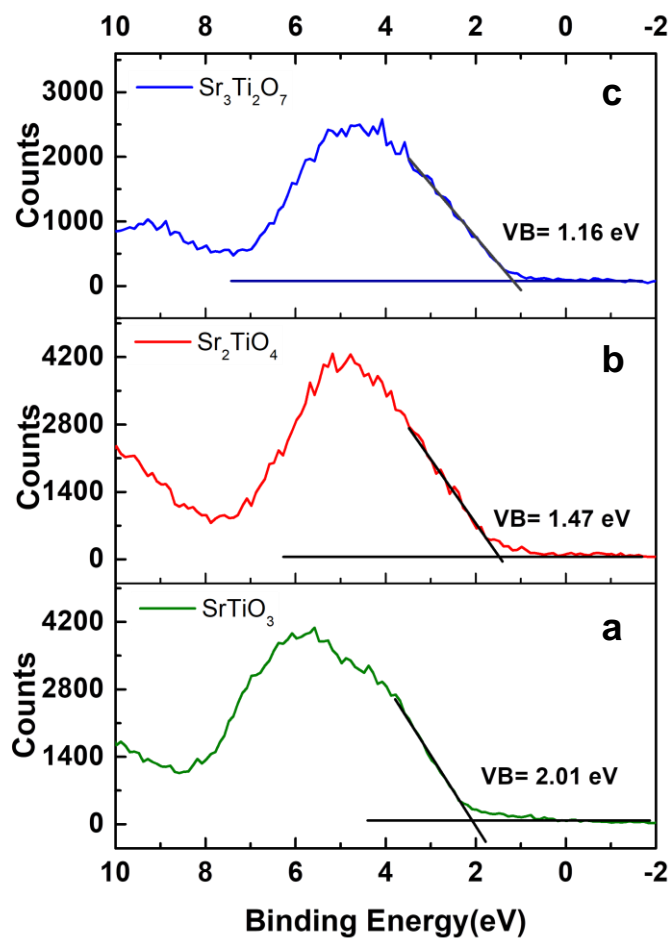

Figure S4: XPS Valence Band Spectra of (a)  $\text{SrTiO}_3$ , (b)  $\text{Sr}_2\text{TiO}_4$  and (c)  $\text{Sr}_3\text{Ti}_2\text{O}_7$ .

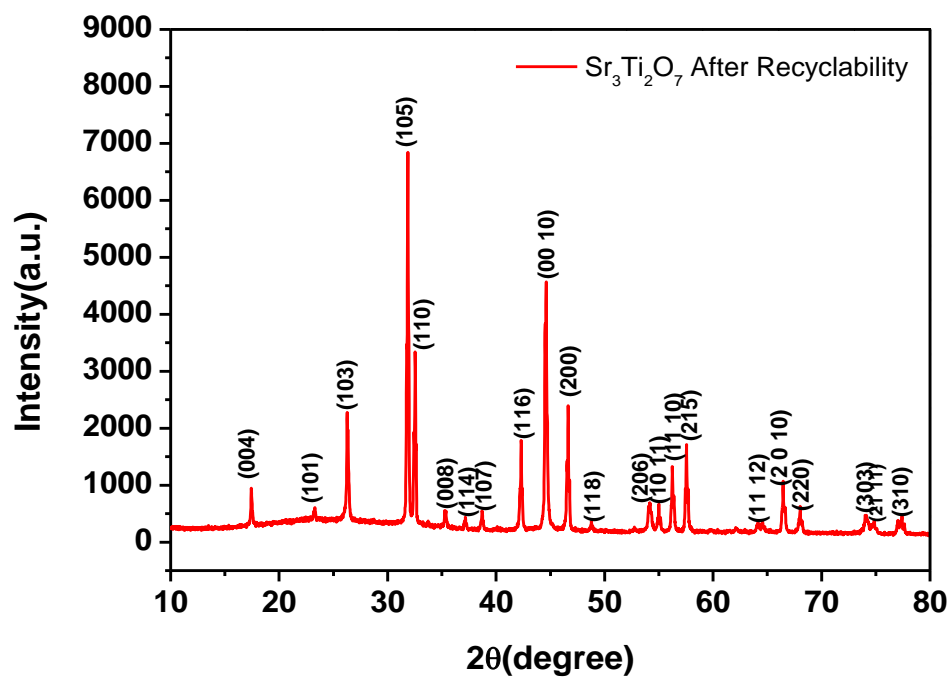

Figure S5: PXRD pattern of Sr<sub>3</sub>Ti<sub>2</sub>O<sub>7</sub> after performing recyclability studies
